# Supplementary material
Source: Springer Nature journal article supplement (https://www.springermedizin.de/resource/supplementary/12903_2010_180_MOESM3_ESM.pdf/9516294)

# Proportion of examined adolescents who were cariesfree by county of residence

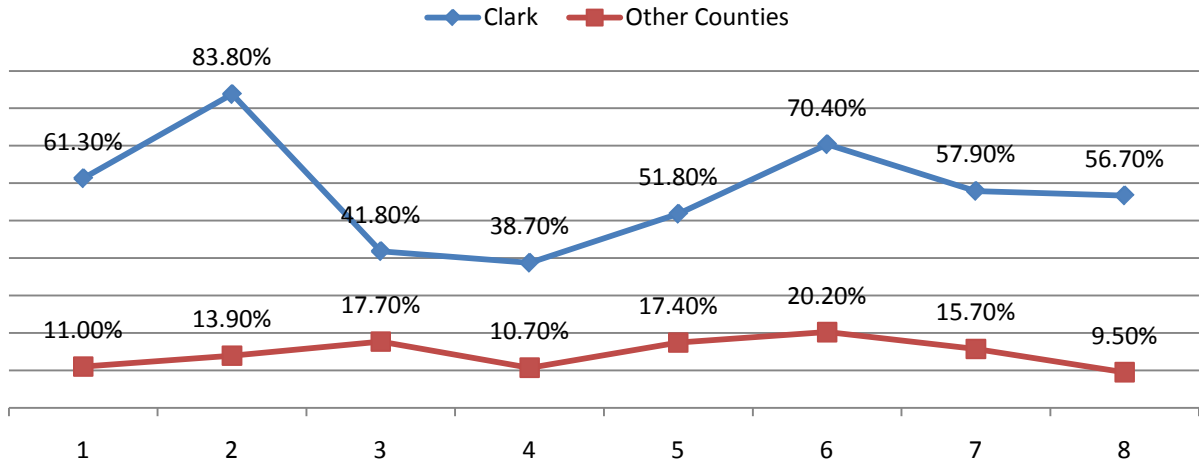

Supplement: MOESM3 [file 9516294]
